# Supplementary material
Source: PubMed Central journal article supplement (PMC4411777)
Supplement: peds.2014-1058_peds.2014-1058SupplementaryData.pdf [file peds.2014-1058_peds.2014-1058SupplementaryData.pdf]

## Supplemental Information

**SUPPLEMENTAL TABLE 5** ICD-9 Codes Used for Analysis

| Variable                                      | ICD-9 Code                                                                                                                                                                            |
|-----------------------------------------------|---------------------------------------------------------------------------------------------------------------------------------------------------------------------------------------|
| <b>Diagnoses</b>                              |                                                                                                                                                                                       |
| NEC                                           | 777.5, 777.51–777.53                                                                                                                                                                  |
| Respiratory distress syndrome                 | 769                                                                                                                                                                                   |
| Other pulmonary disorders                     | 770.0–770.2, 770.84, 770.86–770.88                                                                                                                                                    |
| Intraventricular hemorrhage<br>grades 3 and 4 | 772.13–772.14                                                                                                                                                                         |
| Patent ductus arteriosus                      | 747.0                                                                                                                                                                                 |
| Ventricular septal defect                     | 745.4                                                                                                                                                                                 |
| Atrial septal defect                          | 745.5                                                                                                                                                                                 |
| Pulmonary hemorrhage                          | 770.3                                                                                                                                                                                 |
| Sepsis                                        | 771.81, 038, 038.0–038.1, 038.10–038.12, 038.19, 038.2,<br>038.3–038.4, 038.40–038.44, 038.49, 038.8–038.9,<br>995.91–995.92                                                          |
| Disseminated intravascular coagulation        | 776.2, 286.6                                                                                                                                                                          |
| Polycythemia                                  | 289.6                                                                                                                                                                                 |
| Thrombocytopenia                              | 776.1, 287.4, 287.3, 287.30, 287.33, 287.5                                                                                                                                            |
| Trisomy 13                                    | 758.1                                                                                                                                                                                 |
| Trisomy 18                                    | 758.2                                                                                                                                                                                 |
| Significant cardiac defects                   | 745.6, 745.61, 745.69, 746.01, 746.02, 746.09, 746.1, 746.2,<br>746.3, 746.5, 746.6, 746.7, 746.81, 746.83, 746.84,<br>747.22, 747.41, 747.42                                         |
| <b>Birth weight categories, g</b>             |                                                                                                                                                                                       |
| <1000                                         | 764.01, 764.11, 764.21, 764.91, 765.01, 765.11, V21.31,<br>764.02, 764.03, 764.12, 764.13, 764.22, 764.23, 764.92,<br>764.93, 765.02, 765.03, 765.12, 765.13, V21.32                  |
| 1000–1500                                     | 764.04, 764.05, 764.14, 764.15, 764.24, 764.25, 764.94,<br>764.95, 765.04, 765.05, 765.14,                                                                                            |
| 1500–2500                                     | 765.15, V21.33                                                                                                                                                                        |
| >2500                                         | 764.06, 764.07, 764.16, 764.17, 764.26, 764.27, 764.96, 764.97<br>765.06, 765.07, 765.16, 765.17, V21.34, 764.08, 764.18,<br>764.28, 764.98, 765.08, 765.18, V21.35                   |
| <b>Gestational age categories, wk</b>         |                                                                                                                                                                                       |
| ≤24                                           | 765.21, 765.22                                                                                                                                                                        |
| 25–26                                         | 765.23                                                                                                                                                                                |
| 27–28                                         | 765.24                                                                                                                                                                                |
| 29–30                                         | 765.25                                                                                                                                                                                |
| 31–32                                         | 765.26                                                                                                                                                                                |
| 33–34                                         | 765.27                                                                                                                                                                                |
| 35–36                                         | 765.28                                                                                                                                                                                |
| >37                                           | 765.29                                                                                                                                                                                |
| <b>Procedures</b>                             |                                                                                                                                                                                       |
| Peritoneal drainage                           | 54.91                                                                                                                                                                                 |
| Laparotomy                                    | 45–45.03, 45.1, 45.15, 45.26, 45.3–45.4, 45.40–45.41,<br>45.49, 45.5–45.52, 45.6–45.63, 45.7–45.94, 46–46.11<br>46.13–46.14, 46.2–46.79, 54.1–54.2, 54.45, 54.51–54.59,<br>54.6–54.64 |
